# Supplementary material for: Smartphone-assisted colorimetric determination of uranyl ions in aqueous solutions
Source: Royal Society of Chemistry journal article supplement (doi:10.1039/d2nj05844h), 2023-01-01
Supplement: d2nj05844h1.pdf [file d2nj05844h1.pdf]

## Electronic supplementary information

### Smartphone-assisted colorimetric determination of uranyl ions in aqueous solutions

Yufei Lei,<sup>a1</sup> Yujie Li,<sup>a1</sup> Chen Liu,<sup>a</sup> Liqong He,<sup>a</sup> Qian Li,<sup>a</sup> Lifu Liao<sup>a</sup> and Xilin Xiao<sup>\*ab</sup>

<sup>a</sup> School of Chemistry and Chemical Engineering, School of Resource & Environment and Safety Engineering, School of Public Health, Hunan Key Laboratory for the Design and Application of Actinide Complexes, University of South China, Hengyang, Hunan 421001, P. R. China.

<sup>b</sup> State Key Laboratory of Chemo/Biosensing and Chemometrics, Hunan University, Changsha, Hunan 410082, P. R. China.

<sup>1</sup> These authors contributed equally to this work.

\* Corresponding authors

E-mail address: xiaoxl2001@163.com (Xilin Xiao)

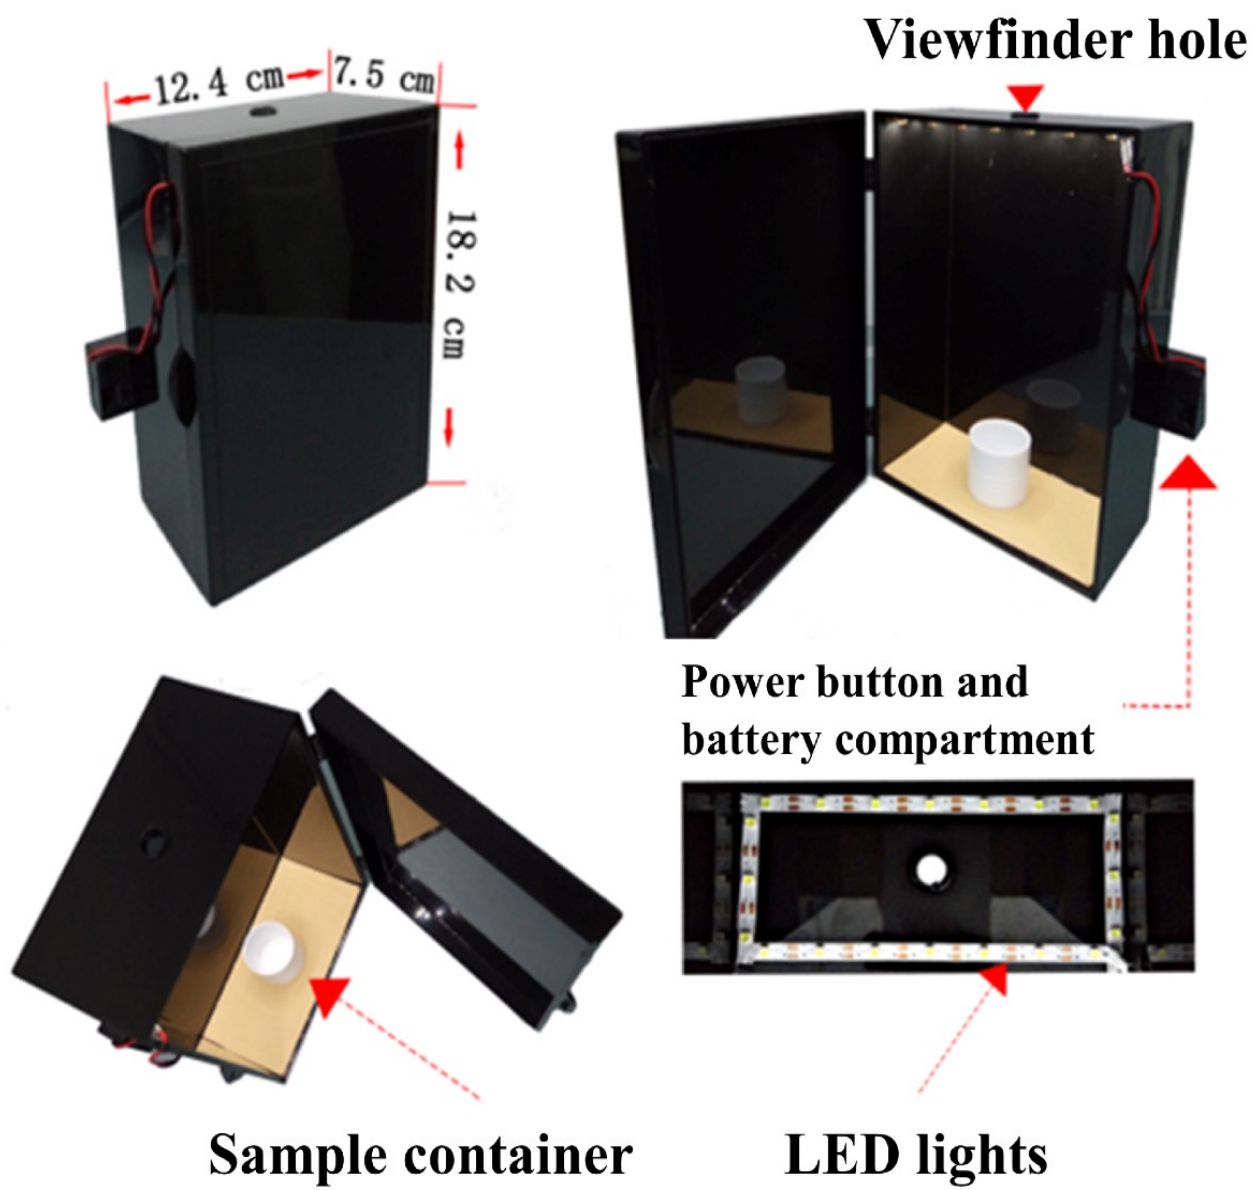

**Fig. S1** Structure of the colorimetric viewfinder.

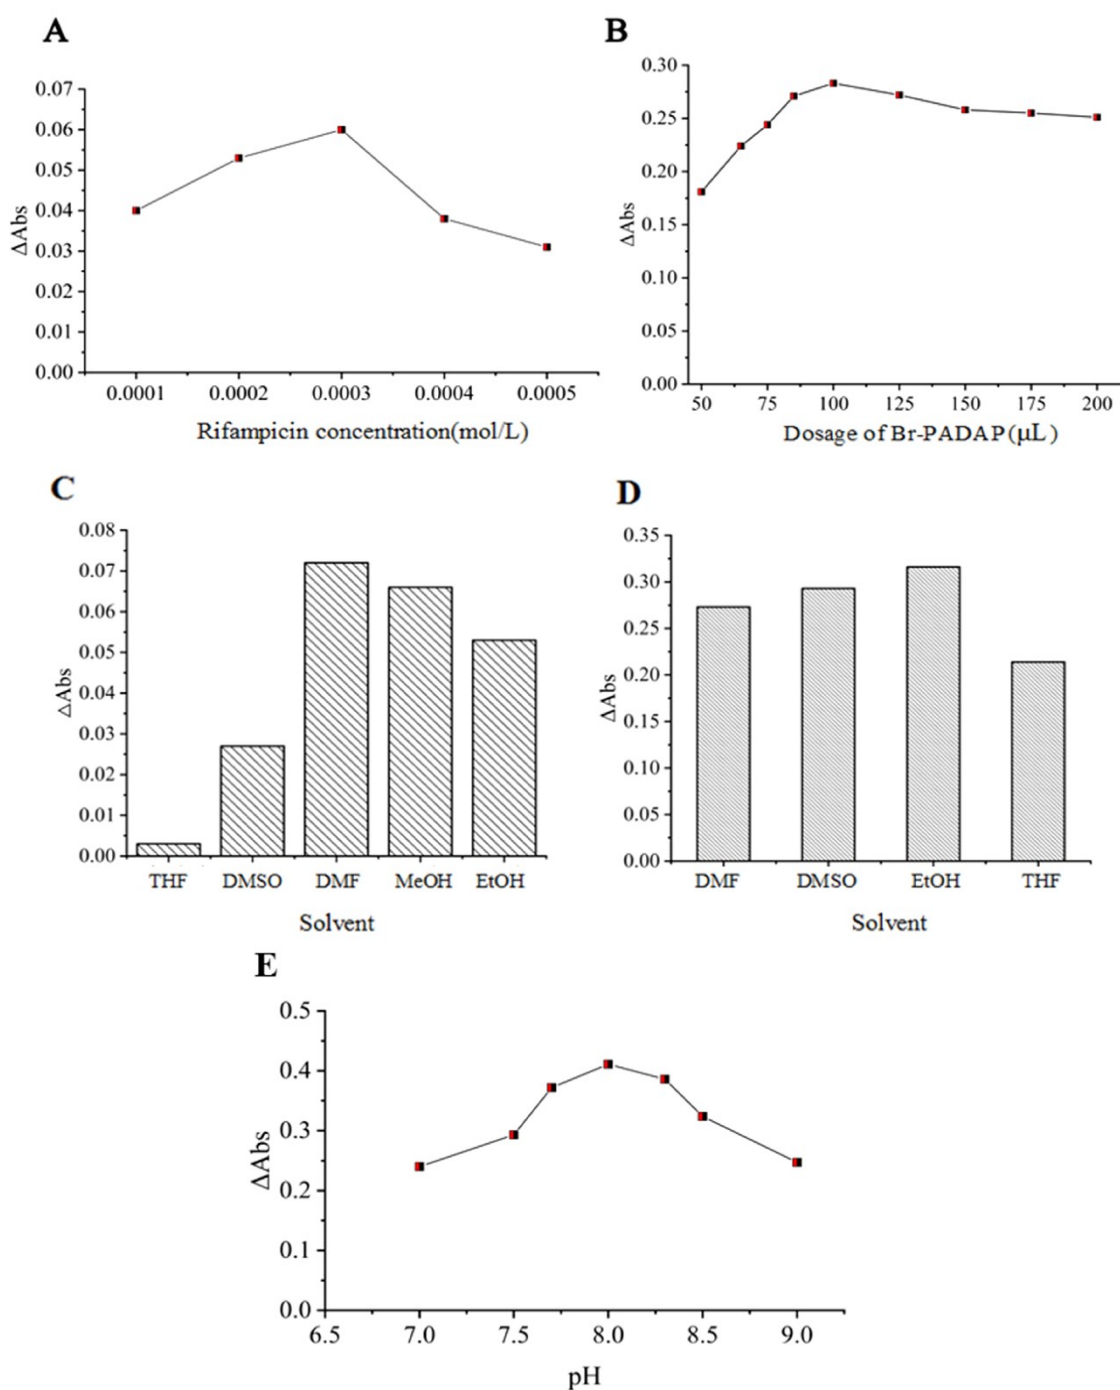

**Fig. S2** Absorbance difference values of the rifampicin system with different concentrations of Rifampicin fixed at 2 mL dosage (A). Absorbance difference values of Br-PADAP at a fixed concentration of 1mM with different dosages (B). Absorbance difference values of rifampicin system(C) and Br-PADAP system (D) in different solvents. Absorbance difference values of Br-PADAP system in different pH values(E).

**A**

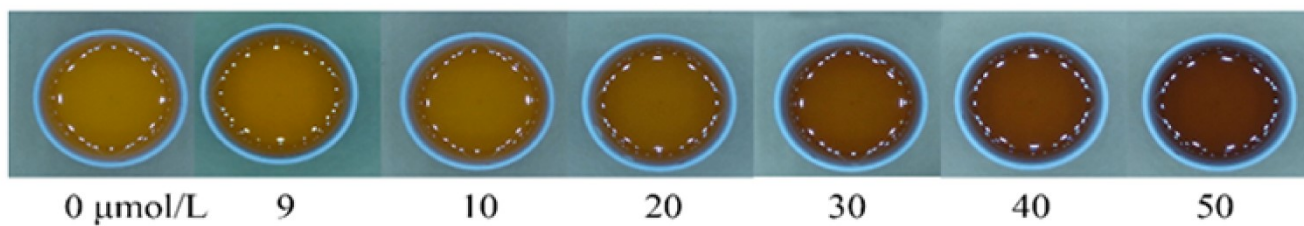

**B**

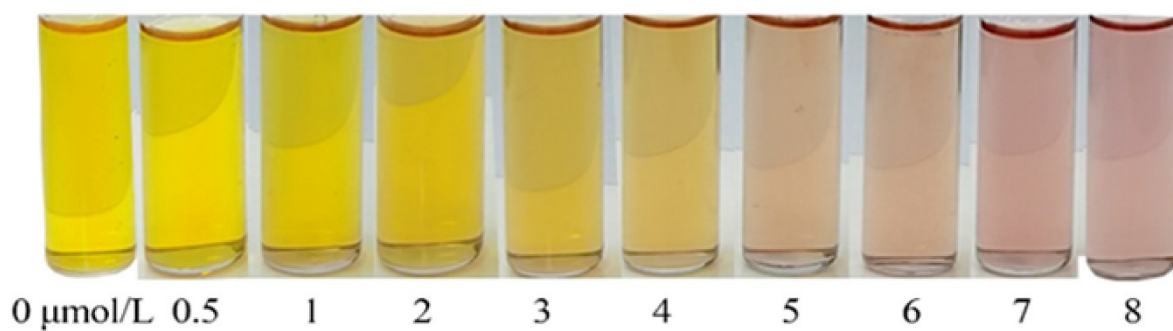

**Fig. S3** Photographs of the detection solution of rifampicin system (A) and Br-PADAP (B) system mixed with different concentrations of  $\text{UO}_2^{2+}$ .

**Table S1** Comparison of methods for determination of  $\text{UO}_2^{2+}$ .

| Detection platforms                                                                 | Method           | Linear range                                 | Detection limit                            | Ref.      |
|-------------------------------------------------------------------------------------|------------------|----------------------------------------------|--------------------------------------------|-----------|
| Triton X-100 micelles-capped curcumin                                               | colorimetry      | 3.7–14 $\mu\text{M}$                         | 3.7 $\mu\text{M}$                          | 1         |
| Nitrophenyldiacetic acids–AuNPs                                                     | colorimetry      | 0.5–3 $\mu\text{M}$                          | 2 $\mu\text{M}$                            | 2         |
| VPA-AuNPs                                                                           | colorimetry      | 0.5–10 $\mu\text{M}$ ,<br>4–20 $\mu\text{M}$ | 1.07 $\mu\text{M}$                         | 3         |
| Dual-colour label-free carbon dots                                                  | fluorescence     | 0–30.0 $\mu\text{M}$                         | 8.15 $\mu\text{M}$                         | 4         |
| Europium metal-organic framework                                                    | fluorescence     | 12.5–87.5 $\mu\text{M}$                      | 2.5 $\mu\text{M}$                          | 5         |
| $\text{Fe}_3\text{S}_4$ nanoparticles wrapped in a g- $\text{C}_3\text{N}_4$ matrix | electrochemistry | 0.05–8 $\mu\text{M}$                         | 0.22 $\mu\text{M}$                         | 6         |
| Rifampicin system;<br>Br–PADAP system                                               | colorimetry      | 4–50 $\mu\text{M}$ ;<br>0.9–7 $\mu\text{M}$  | 3.17 $\mu\text{M}$ ;<br>0.89 $\mu\text{M}$ | This work |

## References

- 1 J.-H. Zhu, X. Zhao, J. Yang, Y.-T. Tan, L. Zhang, S.-P. Liu, Z.-F. Liu and X.-L. Hu, *Spectrochimica Acta Part A: Molecular and Biomolecular Spectroscopy*, 2016, **159**, 146-150.
- 2 S. Heo, H. Choi, J. Ahn, R. Koutavarapu, H. J. Jung, J. H. Jung and M. Y. Choi, *Journal of Nanoscience and Nanotechnology*, 2019, **19**, 2903-2908.
- 3 L. Zhang, D. Huang, P. Zhao, G. Yue, L. Yang and W. Dan, *Spectrochimica Acta Part A: Molecular and Biomolecular Spectroscopy*, 2021, **269**, 120748.
- 4 J. Qian, N. Cao, J. Zhang, J. Hou, Q. Chen, C. Zhang, Y. Sun, S. Liu, L. He, K. Zhang and H. Zhou, *Chinese Chemical Letters*, 2020, **31**, 2925-2928.
- 5 L. Li, S. Shen, J. Su, W. Ai, Y. Bai and H. Liu, *Analytical and Bioanalytical Chemistry*, 2019, **411**, 4213-4220.
- 6 A. Bashir, A. H. Pandith, A. Qureashi and L. A. Malik, *New Journal of Chemistry*, 2023, DOI: 10.1039/D2NJ04933C.
